# Supplementary material for: Cas9 protein delivery non-integrating lentiviral vectors for gene correction in sickle cell disease
Source: PubMed Central journal article supplement — Mol Ther Methods Clin Dev. 2021 Mar 3;21:121–32. doi: 10.1016/j.omtm.2021.02.022 (PMC8005818; doi:10.1016/j.omtm.2021.02.022), 2021-03-03

**OMTM, Volume 21**

**Supplemental information**

**Cas9 protein delivery non-integrating  
lentiviral vectors for gene correction  
in sickle cell disease**

**Naoya Uchida, Claire M. Drysdale, Tina Nassehi, Jackson Gamer, Morgan Yapundich, Julia DiNicola, Yoshitaka Shibata, Malikiya Hinds, Bjorg Gudmundsdottir, Juan J. Haro-Mora, Selami Demirci, and John F. Tisdale**

## Supplementary table

**Supplementary table 1. Guide RNA target sequence**

| Guide RNA | Target sequence      |
|-----------|----------------------|
| GFP       | GGGCACGGGCAGCTTGCCGG |
| BG1       | CTTGCCCCACAGGGCAGTAA |
| BG2       | TCCACATGCCCAGTTTCTAT |
| BG3       | ACCAATAGAAACTGGGCATG |
| BG4       | CCACGTTCACCTTGCCCCAC |
| BG5       | AAGGTGAACGTGGATGAAGT |
| BG6       | TCCCACCCTTAGGCTGCTGG |
| BG7       | GCAACCTCAAACAGACACCA |
| BG8       | GTGAACGTGGATGAAGTTGG |
| BG9       | GAAGTTGGTGGTGAGGCCCT |
| BG10      | GTTACTGCCCTGTGGGGCA  |
| BG11      | GTAACGGCAGACTTCTCCTC |
| SG11      | GTAACGGCAGACTTCTCCAC |





| GFP-YFP+                            | Cas9 integration | Integrating gRNA with CypA-Cas9 | Integrating gRNA with Cas9-CypA | Non-integrating gRNA with CypA-Cas9 | Non-integrating gRNA with Cas9-CypA | No Cas9 | No transduction |
|-------------------------------------|------------------|---------------------------------|---------------------------------|-------------------------------------|-------------------------------------|---------|-----------------|
| Cas9 integration                    | n.s.             | <0.05                           | n.s.                            | n.s.                                | <0.01                               | <0.01   | <0.01           |
| Integrating gRNA with CypA-Cas9     | <0.05            | n.s.                            | n.s.                            | <0.01                               | <0.01                               | <0.01   | <0.01           |
| Integrating gRNA with Cas9-CypA     | n.s.             | n.s.                            | n.s.                            | <0.01                               | <0.01                               | <0.01   | <0.01           |
| Non-integrating gRNA with CypA-Cas9 | n.s.             | <0.01                           | <0.01                           | n.s.                                | <0.01                               | <0.01   | <0.01           |
| Non-integrating gRNA with Cas9-CypA | <0.01            | <0.01                           | <0.01                           | <0.01                               | n.s.                                | <0.01   | <0.01           |
| No Cas9                             | <0.01            | <0.01                           | <0.01                           | <0.01                               | <0.01                               | n.s.    | n.s.            |
| No transduction                     | <0.01            | <0.01                           | <0.01                           | <0.01                               | <0.01                               | n.s.    | n.s.            |

**Figure 1e**

| GFP-YFP-        | CypA-Cas9 | Cas9-CypA | Cas9  | No Cas9 | No transduction |
|-----------------|-----------|-----------|-------|---------|-----------------|
| CypA-Cas9       | n.s.      | n.s.      | n.s.  | <0.01   | <0.01           |
| Cas9-CypA       | n.s.      | n.s.      | n.s.  | <0.01   | <0.01           |
| Cas9            | n.s.      | n.s.      | n.s.  | <0.01   | <0.01           |
| No Cas9         | <0.01     | <0.01     | <0.01 | n.s.    | n.s.            |
| No transduction | <0.01     | <0.01     | <0.01 | n.s.    | n.s.            |

| GFP+YFP+        | CypA-Cas9 | Cas9-CypA | Cas9  | No Cas9 | No transduction |
|-----------------|-----------|-----------|-------|---------|-----------------|
| CypA-Cas9       | n.s.      | <0.05     | n.s.  | <0.01   | <0.01           |
| Cas9-CypA       | <0.05     | n.s.      | n.s.  | <0.01   | <0.01           |
| Cas9            | n.s.      | n.s.      | n.s.  | <0.01   | <0.01           |
| No Cas9         | <0.01     | <0.01     | <0.01 | n.s.    | n.s.            |
| No transduction | <0.01     | <0.01     | <0.01 | n.s.    | n.s.            |

|                 |           |           |       |         |                 |
|-----------------|-----------|-----------|-------|---------|-----------------|
| GFP-YFP+        | CypA-Cas9 | Cas9-CypA | Cas9  | No Cas9 | No transduction |
| CypA-Cas9       | n.s.      | <0.05     | <0.05 | <0.01   | <0.01           |
| Cas9-CypA       | <0.05     | n.s.      | n.s.  | <0.01   | <0.01           |
| Cas9            | <0.05     | n.s.      | n.s.  | <0.01   | <0.01           |
| No Cas9         | <0.01     | <0.01     | <0.01 | n.s.    | n.s.            |
| No transduction | <0.01     | <0.01     | <0.01 | n.s.    | n.s.            |

**Figure 1h**

|                                |                  |                                |                               |         |         |                 |
|--------------------------------|------------------|--------------------------------|-------------------------------|---------|---------|-----------------|
| GFP-YFP-                       | Integrating Cas9 | Donor vector with Cas9 protein | gRNA vector with Cas9 protein | No gRNA | No Cas9 | No transduction |
| Integrating Cas9               | n.s.             | <0.01                          | n.s.                          | <0.01   | <0.01   | <0.01           |
| Donor vector with Cas9 protein | <0.01            | n.s.                           | <0.01                         | <0.01   | <0.01   | <0.01           |
| gRNA vector with Cas9 protein  | n.s.             | <0.01                          | n.s.                          | <0.01   | <0.01   | <0.01           |
| No gRNA                        | <0.01            | <0.01                          | <0.01                         | n.s.    | n.s.    | n.s.            |
| No Cas9                        | <0.01            | <0.01                          | <0.01                         | n.s.    | n.s.    | n.s.            |
| No transduction                | <0.01            | <0.01                          | <0.01                         | n.s.    | n.s.    | n.s.            |

|                                |                  |                                |                               |         |         |                 |
|--------------------------------|------------------|--------------------------------|-------------------------------|---------|---------|-----------------|
| GFP+YFP+                       | Integrating Cas9 | Donor vector with Cas9 protein | gRNA vector with Cas9 protein | No gRNA | No Cas9 | No transduction |
| Integrating Cas9               | n.s.             | <0.05                          | n.s.                          | n.s.    | n.s.    | <0.01           |
| Donor vector with Cas9 protein | <0.05            | n.s.                           | <0.05                         | n.s.    | <0.01   | <0.01           |
| gRNA vector with Cas9 protein  | n.s.             | <0.05                          | n.s.                          | n.s.    | n.s.    | <0.01           |
| No gRNA                        | n.s.             | n.s.                           | n.s.                          | n.s.    | n.s.    | <0.01           |
| No Cas9                        | n.s.             | <0.01                          | n.s.                          | n.s.    | n.s.    | <0.01           |

|                 |       |       |       |       |       |      |
|-----------------|-------|-------|-------|-------|-------|------|
| No transduction | <0.01 | <0.01 | <0.01 | <0.01 | <0.01 | n.s. |
|-----------------|-------|-------|-------|-------|-------|------|

| GFP-YFP+                       | Integrating Cas9 | Donor vector with Cas9 protein | gRNA vector with Cas9 protein | No gRNA | No Cas9 | No transduction |
|--------------------------------|------------------|--------------------------------|-------------------------------|---------|---------|-----------------|
| Integrating Cas9               | n.s.             | <0.01                          | <0.01                         | <0.01   | <0.01   | <0.01           |
| Donor vector with Cas9 protein | <0.01            | n.s.                           | <0.01                         | n.s.    | n.s.    | n.s.            |
| gRNA vector with Cas9 protein  | <0.01            | <0.01                          | n.s.                          | <0.01   | <0.01   | <0.01           |
| No gRNA                        | <0.01            | n.s.                           | <0.01                         | n.s.    | n.s.    | n.s.            |
| No Cas9                        | <0.01            | n.s.                           | <0.01                         | n.s.    | n.s.    | n.s.            |
| No transduction                | <0.01            | n.s.                           | <0.01                         | n.s.    | n.s.    | n.s.            |

**Figure 2b**

| Titers     | All-in-one | 2xgRNA | 4xgRNA | 6xgRNA | 9xgRNA |
|------------|------------|--------|--------|--------|--------|
| All-in-one | n.s.       | n.s.   | <0.01  | <0.01  | <0.05  |
| 2xgRNA     | n.s.       | n.s.   | <0.05  | <0.05  | n.s.   |
| 4xgRNA     | <0.01      | <0.05  | n.s.   | n.s.   | n.s.   |
| 6xgRNA     | <0.01      | <0.05  | n.s.   | n.s.   | n.s.   |
| 9xgRNA     | <0.05      | n.s.   | n.s.   | n.s.   | n.s.   |

**Figure 2c**

| GFP-YFP-   | All-in-one | 2xgRN A | 4xgRN A | 6xgRN A | 9xgRN A | Donor only | No transduction |
|------------|------------|---------|---------|---------|---------|------------|-----------------|
| All-in-one | n.s.       | <0.01   | <0.01   | <0.01   | <0.01   | <0.01      | <0.01           |
| 2xgRNA     | <0.01      | n.s.    | <0.01   | <0.01   | <0.01   | <0.01      | <0.01           |
| 4xgRNA     | <0.01      | <0.01   | n.s.    | n.s.    | <0.01   | <0.01      | <0.01           |
| 6xgRNA     | <0.01      | <0.01   | n.s.    | n.s.    | <0.01   | <0.01      | <0.01           |
| 9xgRNA     | <0.01      | <0.01   | <0.01   | <0.01   | n.s.    | <0.01      | <0.01           |
| Donor only | <0.01      | <0.01   | <0.01   | <0.01   | <0.01   | n.s.       | n.s.            |

|                 |       |       |       |       |       |      |      |
|-----------------|-------|-------|-------|-------|-------|------|------|
| No transduction | <0.01 | <0.01 | <0.01 | <0.01 | <0.01 | n.s. | n.s. |
|-----------------|-------|-------|-------|-------|-------|------|------|

| GFP+YFP+        | All-in-one | 2xgRN A | 4xgRN A | 6xgRN A | 9xgRN A | Donor only | No transduction |
|-----------------|------------|---------|---------|---------|---------|------------|-----------------|
| All-in-one      | n.s.       | <0.05   | <0.05   | <0.05   | <0.01   | <0.05      | <0.01           |
| 2xgRNA          | <0.05      | n.s.    | n.s.    | n.s.    | n.s.    | n.s.       | n.s.            |
| 4xgRNA          | <0.05      | n.s.    | n.s.    | n.s.    | n.s.    | n.s.       | n.s.            |
| 6xgRNA          | <0.05      | n.s.    | n.s.    | n.s.    | n.s.    | n.s.       | n.s.            |
| 9xgRNA          | <0.01      | n.s.    | n.s.    | n.s.    | n.s.    | n.s.       | n.s.            |
| Donor only      | <0.05      | n.s.    | n.s.    | n.s.    | n.s.    | n.s.       | n.s.            |
| No transduction | <0.01      | n.s.    | n.s.    | n.s.    | n.s.    | n.s.       | n.s.            |

| GFP-YFP+        | All-in-one | 2xgRN A | 4xgRN A | 6xgRN A | 9xgRN A | Donor only | No transduction |
|-----------------|------------|---------|---------|---------|---------|------------|-----------------|
| All-in-one      | n.s.       | n.s.    | <0.05   | n.s.    | n.s.    | <0.01      | <0.01           |
| 2xgRNA          | n.s.       | n.s.    | <0.01   | <0.01   | n.s.    | n.s.       | n.s.            |
| 4xgRNA          | <0.05      | <0.01   | n.s.    | n.s.    | <0.01   | <0.01      | <0.01           |
| 6xgRNA          | n.s.       | <0.01   | n.s.    | n.s.    | <0.01   | <0.01      | <0.01           |
| 9xgRNA          | n.s.       | n.s.    | <0.01   | <0.01   | n.s.    | n.s.       | n.s.            |
| Donor only      | <0.01      | n.s.    | <0.01   | <0.01   | n.s.    | n.s.       | n.s.            |
| No transduction | <0.01      | n.s.    | <0.01   | <0.01   | n.s.    | n.s.       | n.s.            |

**Figure 2d**

| GFP-YFP- | MOI 5 | MOI 10 | MOI 25 | MOI 50 | 4xgRN A | Donor only | No transduction |
|----------|-------|--------|--------|--------|---------|------------|-----------------|
| MOI 5    | n.s.  | <0.01  | <0.01  | <0.01  | <0.01   | <0.01      | <0.01           |
| MOI 10   | <0.01 | n.s.   | n.s.   | n.s.   | <0.01   | <0.01      | <0.01           |
| MOI 25   | <0.01 | n.s.   | n.s.   | n.s.   | <0.01   | <0.01      | <0.01           |
| MOI 50   | <0.01 | n.s.   | n.s.   | n.s.   | <0.01   | <0.01      | <0.01           |
| 4xgRNA   | <0.01 | <0.01  | <0.01  | <0.01  | n.s.    | <0.01      | <0.01           |



|                 |       |       |       |       |       |      |      |
|-----------------|-------|-------|-------|-------|-------|------|------|
| Donor only      | <0.01 | <0.01 | <0.01 | <0.01 | <0.01 | n.s. | n.s. |
| No transduction | <0.01 | <0.01 | <0.01 | <0.01 | <0.01 | n.s. | n.s. |

| GFP+YFP+        | MOI 5 | MOI 10 | MOI 25 | MOI 50 | 4xgRN A | Donor only | No transduction |
|-----------------|-------|--------|--------|--------|---------|------------|-----------------|
| MOI 5           | n.s.  | n.s.   | n.s.   | n.s.   | n.s.    | n.s.       | n.s.            |
| MOI 10          | n.s.  | n.s.   | n.s.   | n.s.   | n.s.    | n.s.       | n.s.            |
| MOI 25          | n.s.  | n.s.   | n.s.   | n.s.   | n.s.    | n.s.       | <0.01           |
| MOI 50          | n.s.  | n.s.   | n.s.   | n.s.   | n.s.    | n.s.       | <0.05           |
| 4xgRNA          | n.s.  | n.s.   | n.s.   | n.s.   | n.s.    | n.s.       | n.s.            |
| Donor only      | n.s.  | n.s.   | n.s.   | n.s.   | n.s.    | n.s.       | n.s.            |
| No transduction | n.s.  | n.s.   | <0.01  | <0.05  | n.s.    | n.s.       | n.s.            |

| GFP-YFP+        | MOI 5 | MOI 10 | MOI 25 | MOI 50 | 4xgRN A | Donor only | No transduction |
|-----------------|-------|--------|--------|--------|---------|------------|-----------------|
| MOI 5           | n.s.  | <0.05  | <0.01  | <0.01  | <0.01   | <0.05      | <0.05           |
| MOI 10          | <0.05 | n.s.   | <0.01  | <0.01  | n.s.    | <0.01      | <0.01           |
| MOI 25          | <0.01 | <0.01  | n.s.   | <0.01  | <0.01   | <0.01      | <0.01           |
| MOI 50          | <0.01 | <0.01  | <0.01  | n.s.   | <0.01   | <0.01      | <0.01           |
| 4xgRNA          | <0.01 | n.s.   | <0.01  | <0.01  | n.s.    | <0.01      | <0.01           |
| Donor only      | <0.05 | <0.01  | <0.01  | <0.01  | <0.01   | n.s.       | n.s.            |
| No transduction | <0.05 | <0.01  | <0.01  | <0.01  | <0.01   | n.s.       | n.s.            |

**Figure 3b**

| $\beta$ -globin /YFP intensity | Integrating |      |      |      |      |       | Non-integrating |      |      |      |      |       | No transduction |
|--------------------------------|-------------|------|------|------|------|-------|-----------------|------|------|------|------|-------|-----------------|
|                                | BG 1        | BG 3 | BG 4 | BG 5 | BG 8 | SG 11 | BG 1            | BG 3 | BG 4 | BG 5 | BG 8 | SG 11 |                 |

|                 |                 |       |       |       |       |       |       |       |       |       |       |       |       |       |
|-----------------|-----------------|-------|-------|-------|-------|-------|-------|-------|-------|-------|-------|-------|-------|-------|
| Integrating     | BG 1            | n.s.  | <0.01 | n.s.  | <0.01 | <0.01 | n.s.  | <0.01 | <0.01 | <0.01 | <0.01 | <0.05 | <0.01 | <0.01 |
|                 | BG 3            | <0.01 | n.s.  | <0.01 | n.s.  | n.s.  | <0.01 | <0.01 | <0.01 | <0.01 | <0.01 | <0.01 | <0.01 | <0.01 |
|                 | BG 4            | n.s.  | <0.01 | n.s.  | <0.01 | <0.05 | n.s.  | <0.01 | <0.01 | <0.01 | <0.01 | <0.01 | <0.01 | <0.01 |
|                 | BG 5            | <0.01 | n.s.  | <0.01 | n.s.  | <0.01 | <0.01 | <0.01 | <0.01 | <0.01 | <0.01 | <0.01 | <0.01 | <0.01 |
|                 | BG 8            | <0.01 | n.s.  | <0.05 | <0.01 | n.s.  | <0.01 | <0.01 | <0.01 | <0.01 | <0.01 | <0.01 | <0.01 | <0.01 |
|                 | SG 11           | n.s.  | <0.01 | n.s.  | <0.01 | <0.01 | n.s.  | <0.01 | <0.01 | <0.01 | <0.01 | <0.01 | <0.01 | <0.01 |
|                 | Non-integrating | BG 1  | <0.01 | <0.01 | <0.01 | <0.01 | <0.01 | <0.01 | n.s.  | n.s.  | n.s.  | <0.01 | <0.01 | <0.01 |
| BG 3            |                 | <0.01 | <0.01 | <0.01 | <0.01 | <0.01 | <0.01 | n.s.  | n.s.  | n.s.  | <0.05 | <0.01 | <0.01 | <0.05 |
| BG 4            |                 | <0.01 | <0.01 | <0.01 | <0.01 | <0.01 | <0.01 | n.s.  | n.s.  | n.s.  | <0.01 | <0.01 | <0.01 | n.s.  |
| BG 5            |                 | <0.01 | <0.01 | <0.01 | <0.01 | <0.01 | <0.01 | <0.01 | <0.05 | <0.01 | n.s.  | <0.05 | n.s.  | <0.01 |
| BG 8            |                 | <0.05 | <0.01 | <0.01 | <0.01 | <0.01 | <0.01 | <0.01 | <0.01 | <0.01 | <0.05 | n.s.  | n.s.  | <0.01 |
| SG 11           |                 | <0.01 | <0.01 | <0.01 | <0.01 | <0.01 | <0.01 | <0.01 | <0.01 | <0.01 | n.s.  | n.s.  | n.s.  | <0.01 |
| No transduction |                 | <0.01 | <0.01 | <0.01 | <0.01 | <0.01 | <0.01 | n.s.  | <0.05 | n.s.  | <0.01 | <0.01 | <0.01 | n.s.  |

**Figure 3f**

| HDR at the DNA level | gRNA vector and donor vector | gRNA-donor all-in-one | Donor-gRNA all-in-one | Donor only | No transduction |
|----------------------|------------------------------|-----------------------|-----------------------|------------|-----------------|
|----------------------|------------------------------|-----------------------|-----------------------|------------|-----------------|

|                              |       |      |       |       |       |
|------------------------------|-------|------|-------|-------|-------|
| gRNA vector and donor vector | n.s.  | n.s. | n.s.  | <0.05 | <0.05 |
| gRNA-donor all-in-one        | n.s.  | n.s. | n.s.  | n.s.  | n.s.  |
| Donor-gRNA all-in-one        | n.s.  | n.s. | n.s.  | <0.05 | <0.05 |
| Donor only                   | <0.05 | n.s. | <0.05 | n.s.  | n.s.  |
| No transduction              | <0.05 | n.s. | <0.05 | n.s.  | n.s.  |

| Indel at the DNA level       | gRNA vector and donor vector | gRNA-donor all-in-one | Donor-gRNA all-in-one | Donor only | No transduction |
|------------------------------|------------------------------|-----------------------|-----------------------|------------|-----------------|
| gRNA vector and donor vector | n.s.                         | n.s.                  | n.s.                  | <0.05      | <0.05           |
| gRNA-donor all-in-one        | n.s.                         | n.s.                  | n.s.                  | <0.05      | <0.05           |
| Donor-gRNA all-in-one        | n.s.                         | n.s.                  | n.s.                  | <0.01      | <0.01           |
| Donor only                   | <0.05                        | <0.05                 | <0.01                 | n.s.       | n.s.            |
| No transduction              | <0.05                        | <0.05                 | <0.01                 | n.s.       | n.s.            |

**Figure 3h**

| Gene correction at the protein level | gRNA vector and donor vector | gRNA-donor all-in-one | Donor-gRNA all-in-one | Donor only | No transduction |
|--------------------------------------|------------------------------|-----------------------|-----------------------|------------|-----------------|
| gRNA vector and donor vector         | n.s.                         | n.s.                  | n.s.                  | <0.01      | <0.01           |
| gRNA-donor all-in-one                | n.s.                         | n.s.                  | n.s.                  | <0.05      | <0.05           |
| Donor-gRNA all-in-one                | n.s.                         | n.s.                  | n.s.                  | <0.01      | <0.01           |
| Donor only                           | <0.01                        | <0.05                 | <0.01                 | n.s.       | n.s.            |
| No transduction                      | <0.01                        | <0.05                 | <0.01                 | n.s.       | n.s.            |

**Figure 3i**

| Cell counts                  | gRNA vector and donor vector | gRNA-donor all-in-one | Donor-gRNA all-in-one | Donor only | No transduction |
|------------------------------|------------------------------|-----------------------|-----------------------|------------|-----------------|
| gRNA vector and donor vector | n.s.                         | n.s.                  | n.s.                  | n.s.       | n.s.            |
| gRNA-donor all-in-one        | n.s.                         | n.s.                  | n.s.                  | n.s.       | n.s.            |
| Donor-gRNA all-in-one        | n.s.                         | n.s.                  | n.s.                  | n.s.       | n.s.            |
| Donor only                   | n.s.                         | n.s.                  | n.s.                  | n.s.       | n.s.            |
| No transduction              | n.s.                         | n.s.                  | n.s.                  | n.s.       | n.s.            |

**Supplementary figure 1c**

| %GFP             | Cas9 integration | CypA-Cas9 | Cas9-CypA | No Cas9 | No transduction |
|------------------|------------------|-----------|-----------|---------|-----------------|
| Cas9 integration | n.s.             | <0.01     | <0.05     | <0.01   | <0.01           |
| CypA-Cas9        | <0.01            | n.s.      | n.s.      | <0.01   | <0.01           |
| Cas9-CypA        | <0.05            | n.s.      | n.s.      | <0.01   | <0.01           |
| No Cas9          | <0.01            | <0.01     | <0.01     | n.s.    | n.s.            |
| No transduction  | <0.01            | <0.01     | <0.01     | n.s.    | n.s.            |

**Supplementary figure 2b**

| GFP-YFP-                           | One time transduction | Two time transduction | One time transduction without Cas9 | Two time transduction without Cas9 | No transduction |
|------------------------------------|-----------------------|-----------------------|------------------------------------|------------------------------------|-----------------|
| One time transduction              | n.s.                  | n.s.                  | <0.01                              | <0.01                              | <0.01           |
| Two time transduction              | n.s.                  | n.s.                  | <0.01                              | <0.01                              | <0.01           |
| One time transduction without Cas9 | <0.01                 | <0.01                 | n.s.                               | n.s.                               | n.s.            |

|                                    |       |       |      |      |      |
|------------------------------------|-------|-------|------|------|------|
| Two time transduction without Cas9 | <0.01 | <0.01 | n.s. | n.s. | n.s. |
| No transduction                    | <0.01 | <0.01 | n.s. | n.s. | n.s. |

| GFP+YFP+                           | One time transduction | Two time transduction | One time transduction without Cas9 | Two time transduction without Cas9 | No transduction |
|------------------------------------|-----------------------|-----------------------|------------------------------------|------------------------------------|-----------------|
| One time transduction              | n.s.                  | n.s.                  | <0.05                              | <0.01                              | n.s.            |
| Two time transduction              | n.s.                  | n.s.                  | <0.05                              | <0.01                              | n.s.            |
| One time transduction without Cas9 | <0.05                 | <0.05                 | n.s.                               | n.s.                               | <0.01           |
| Two time transduction without Cas9 | <0.01                 | <0.01                 | n.s.                               | n.s.                               | <0.01           |
| No transduction                    | n.s.                  | n.s.                  | <0.01                              | <0.01                              | n.s.            |

| GFP-YFP+                           | One time transduction | Two time transduction | One time transduction without Cas9 | Two time transduction without Cas9 | No transduction |
|------------------------------------|-----------------------|-----------------------|------------------------------------|------------------------------------|-----------------|
| One time transduction              | n.s.                  | n.s.                  | <0.01                              | <0.01                              | <0.01           |
| Two time transduction              | n.s.                  | n.s.                  | <0.01                              | <0.01                              | <0.01           |
| One time transduction without Cas9 | <0.01                 | <0.01                 | n.s.                               | n.s.                               | n.s.            |
| Two time transduction without Cas9 | <0.01                 | <0.01                 | n.s.                               | n.s.                               | <0.01           |

|                 |       |       |      |       |      |
|-----------------|-------|-------|------|-------|------|
| No transduction | <0.01 | <0.01 | n.s. | <0.01 | n.s. |
|-----------------|-------|-------|------|-------|------|

**Supplementary figure 2c**

| Day 3                              | One time transduction | Two time transduction | One time transduction without Cas9 | Two time transduction without Cas9 |
|------------------------------------|-----------------------|-----------------------|------------------------------------|------------------------------------|
| One time transduction              | n.s.                  | n.s.                  | <0.01                              | <0.05                              |
| Two time transduction              | n.s.                  | n.s.                  | <0.01                              | <0.01                              |
| One time transduction without Cas9 | <0.01                 | <0.01                 | n.s.                               | <0.05                              |
| Two time transduction without Cas9 | <0.05                 | <0.01                 | <0.05                              | n.s.                               |

| Day 6                              | One time transduction | Two time transduction | One time transduction without Cas9 | Two time transduction without Cas9 |
|------------------------------------|-----------------------|-----------------------|------------------------------------|------------------------------------|
| One time transduction              | n.s.                  | n.s.                  | <0.01                              | <0.01                              |
| Two time transduction              | n.s.                  | n.s.                  | <0.01                              | <0.01                              |
| One time transduction without Cas9 | <0.01                 | <0.01                 | n.s.                               | n.s.                               |
| Two time transduction without Cas9 | <0.01                 | <0.01                 | n.s.                               | n.s.                               |

| Day 8                              | One time transduction | Two time transduction | One time transduction without Cas9 | Two time transduction without Cas9 |
|------------------------------------|-----------------------|-----------------------|------------------------------------|------------------------------------|
| One time transduction              | n.s.                  | <0.01                 | <0.01                              | n.s.                               |
| Two time transduction              | <0.01                 | n.s.                  | <0.01                              | <0.01                              |
| One time transduction without Cas9 | <0.01                 | <0.01                 | n.s.                               | <0.01                              |
| Two time transduction without Cas9 | n.s.                  | <0.01                 | <0.01                              | n.s.                               |

| Day 10                             | One time transduction | Two time transduction | One time transduction without Cas9 | Two time transduction without Cas9 |
|------------------------------------|-----------------------|-----------------------|------------------------------------|------------------------------------|
| One time transduction              | n.s.                  | n.s.                  | <0.01                              | <0.01                              |
| Two time transduction              | n.s.                  | n.s.                  | <0.01                              | <0.01                              |
| One time transduction without Cas9 | <0.01                 | <0.01                 | n.s.                               | n.s.                               |
| Two time transduction without Cas9 | <0.01                 | <0.01                 | n.s.                               | n.s.                               |

| Day 13                | One time transduction | Two time transduction | One time transduction without Cas9 | Two time transduction without Cas9 |
|-----------------------|-----------------------|-----------------------|------------------------------------|------------------------------------|
| One time transduction | n.s.                  | n.s.                  | <0.01                              | <0.01                              |

|                                    |       |       |       |       |
|------------------------------------|-------|-------|-------|-------|
| Two time transduction              | n.s.  | n.s.  | <0.01 | <0.01 |
| One time transduction without Cas9 | <0.01 | <0.01 | n.s.  | n.s.  |
| Two time transduction without Cas9 | <0.01 | <0.01 | n.s.  | n.s.  |

| Day 15                             | One time transduction | Two time transduction | One time transduction without Cas9 | Two time transduction without Cas9 |
|------------------------------------|-----------------------|-----------------------|------------------------------------|------------------------------------|
| One time transduction              | n.s.                  | n.s.                  | <0.01                              | <0.01                              |
| Two time transduction              | n.s.                  | n.s.                  | <0.01                              | <0.01                              |
| One time transduction without Cas9 | <0.01                 | <0.01                 | n.s.                               | n.s.                               |
| Two time transduction without Cas9 | <0.01                 | <0.01                 | n.s.                               | n.s.                               |

#### Supplementary figure 4a

| GFP-YFP-        | All-in-one | Donor only | No transduction |
|-----------------|------------|------------|-----------------|
| All-in-one      | n.s.       | <0.01      | <0.01           |
| Donor only      | <0.01      | n.s.       | n.s.            |
| No transduction | <0.01      | n.s.       | n.s.            |

| GFP+YFP+        | All-in-one | Donor only | No transduction |
|-----------------|------------|------------|-----------------|
| All-in-one      | n.s.       | <0.01      | <0.01           |
| Donor only      | <0.01      | n.s.       | n.s.            |
| No transduction | <0.01      | n.s.       | n.s.            |



|                 |            |            |                 |
|-----------------|------------|------------|-----------------|
| GFP-YFP+        | All-in-one | Donor only | No transduction |
| All-in-one      | n.s.       | <0.01      | <0.01           |
| Donor only      | <0.01      | n.s.       | <0.05           |
| No transduction | <0.01      | <0.05      | n.s.            |

#### Supplementary figure 4b

|                 |            |            |                 |
|-----------------|------------|------------|-----------------|
| GFP VCN         | All-in-one | Donor only | No transduction |
| All-in-one      | n.s.       | <0.05      | <0.05           |
| Donor only      | <0.05      | n.s.       | n.s.            |
| No transduction | <0.05      | n.s.       | n.s.            |

|                 |            |            |                 |
|-----------------|------------|------------|-----------------|
| YFP VCN         | All-in-one | Donor only | No transduction |
| All-in-one      | n.s.       | <0.01      | <0.01           |
| Donor only      | <0.01      | n.s.       | n.s.            |
| No transduction | <0.01      | n.s.       | n.s.            |

#### Supplementary figure 4c

|                 |            |            |                 |
|-----------------|------------|------------|-----------------|
| LTR VCN         | All-in-one | Donor only | No transduction |
| All-in-one      | n.s.       | n.s.       | n.s.            |
| Donor only      | n.s.       | n.s.       | n.s.            |
| No transduction | n.s.       | n.s.       | n.s.            |

|                 |            |            |                 |
|-----------------|------------|------------|-----------------|
| PS VCN          | All-in-one | Donor only | No transduction |
| All-in-one      | n.s.       | <0.05      | n.s.            |
| Donor only      | <0.05      | n.s.       | n.s.            |
| No transduction | n.s.       | n.s.       | n.s.            |

#### Supplementary figure 5

|                    |                    |                     |            |                 |
|--------------------|--------------------|---------------------|------------|-----------------|
| GFP-YFP-           | A promoter for YFP | No promoter for YFP | Donor only | No transduction |
| A promoter for YFP | n.s.               | <0.01               | <0.01      | <0.01           |

|                     |       |       |       |       |
|---------------------|-------|-------|-------|-------|
| No promoter for YFP | <0.01 | n.s.  | <0.01 | <0.01 |
| Donor only          | <0.01 | <0.01 | n.s.  | n.s.  |
| No transduction     | <0.01 | <0.01 | n.s.  | n.s.  |

|                     |                    |                     |            |                 |
|---------------------|--------------------|---------------------|------------|-----------------|
| GFP+YFP+            | A promoter for YFP | No promoter for YFP | Donor only | No transduction |
| A promoter for YFP  | n.s.               | <0.01               | <0.01      | <0.01           |
| No promoter for YFP | <0.01              | n.s.                | n.s.       | n.s.            |
| Donor only          | <0.01              | n.s.                | n.s.       | n.s.            |
| No transduction     | <0.01              | n.s.                | n.s.       | n.s.            |

|                     |                    |                     |            |                 |
|---------------------|--------------------|---------------------|------------|-----------------|
| GFP-YFP+            | A promoter for YFP | No promoter for YFP | Donor only | No transduction |
| A promoter for YFP  | n.s.               | <0.01               | <0.01      | <0.01           |
| No promoter for YFP | <0.01              | n.s.                | <0.05      | <0.05           |
| Donor only          | <0.01              | <0.05               | n.s.       | n.s.            |
| No transduction     | <0.01              | <0.05               | n.s.       | n.s.            |

### Supplementary figure 6

|            |            |        |         |
|------------|------------|--------|---------|
| Titers     | All-in-one | 9xgRNA | No Cas9 |
| All-in-one | n.s.       | <0.01  | <0.05   |
| 9xgRNA     | <0.01      | n.s.   | n.s.    |
| No Cas9    | <0.05      | n.s.   | n.s.    |

### Supplementary figure 7

|              |            |        |         |         |
|--------------|------------|--------|---------|---------|
| Cas9 amounts | All-in-one | 4xgRNA | No gRNA | No Cas9 |
| All-in-one   | n.s.       | <0.01  | <0.05   | <0.01   |
| 4xgRNA       | <0.01      | n.s.   | <0.01   | <0.01   |
| No gRNA      | <0.05      | <0.01  | n.s.    | <0.01   |
| No Cas9      | <0.01      | <0.01  | <0.01   | n.s.    |

**Supplementary figure 9c**

| %GFP          | gR<br>NA1 | gR<br>NA2 | gR<br>NA3 | gR<br>NA4 | gR<br>NA5 | gR<br>NA6 | gR<br>NA7 | gR<br>NA8 | gR<br>NA9 | gRN<br>A10 | gRN<br>A11 | Donor<br>only |
|---------------|-----------|-----------|-----------|-----------|-----------|-----------|-----------|-----------|-----------|------------|------------|---------------|
| gRNA<br>1     | n.s.      | <0.0<br>5 | <0.0<br>1  | <0.0<br>1  | <0.01         |
| gRNA<br>2     | <0.0<br>5 | n.s.      | <0.0<br>1  | <0.0<br>1  | <0.01         |
| gRNA<br>3     | <0.0<br>1 | <0.0<br>1 | n.s.      | <0.0<br>1  | <0.0<br>1  | <0.01         |
| gRNA<br>4     | <0.0<br>1 | <0.0<br>1 | <0.0<br>1 | n.s.      | n.s.      | <0.0<br>5 | n.s.      | <0.0<br>1 | <0.0<br>1 | <0.0<br>1  | <0.0<br>1  | <0.01         |
| gRNA<br>5     | <0.0<br>1 | <0.0<br>1 | <0.0<br>1 | n.s.      | n.s.      | <0.0<br>1 | n.s.      | <0.0<br>1 | <0.0<br>1 | <0.0<br>1  | <0.0<br>1  | <0.01         |
| gRNA<br>6     | <0.0<br>1 | <0.0<br>1 | <0.0<br>1 | <0.0<br>5 | <0.0<br>1 | n.s.      | <0.0<br>1 | n.s.      | <0.0<br>5 | <0.0<br>1  | n.s.       | <0.01         |
| gRNA<br>7     | <0.0<br>1 | <0.0<br>1 | <0.0<br>1 | n.s.      | n.s.      | <0.0<br>1 | n.s.      | <0.0<br>1 | <0.0<br>1 | <0.0<br>1  | <0.0<br>1  | <0.01         |
| gRNA<br>8     | <0.0<br>1 | <0.0<br>1 | <0.0<br>1 | <0.0<br>1 | <0.0<br>1 | n.s.      | <0.0<br>1 | n.s.      | n.s.      | <0.0<br>1  | n.s.       | <0.01         |
| gRNA<br>9     | <0.0<br>1 | <0.0<br>1 | <0.0<br>1 | <0.0<br>1 | <0.0<br>1 | <0.0<br>5 | <0.0<br>1 | n.s.      | n.s.      | <0.0<br>1  | n.s.       | <0.01         |
| gRNA<br>10    | <0.0<br>1 | n.s.       |            | <0.01         |
| gRNA<br>11    | <0.0<br>1 | <0.0<br>1 | <0.0<br>1 | <0.0<br>1 | <0.0<br>1 | n.s.      | <0.0<br>1 | n.s.      | n.s.      | <0.0<br>1  | n.s.       | <0.01         |
| Donor<br>only | <0.0<br>1  | <0.0<br>1  | n.s.          |

**Supplementary figure 10**

| $\beta$ s-globin | Integrating | All-in-one | 4xgRNA | No transduction |
|------------------|-------------|------------|--------|-----------------|
| Integrating      | n.s.        | <0.01      | <0.01  | <0.01           |
| All-in-one       | <0.01       | n.s.       | <0.01  | <0.01           |



|                 |       |       |       |       |       |       |       |
|-----------------|-------|-------|-------|-------|-------|-------|-------|
| 1.7kb           | n.s.  | n.s.  | n.s.  | n.s.  | n.s.  | n.s.  | <0.01 |
| 2.0kb           | n.s.  | n.s.  | n.s.  | n.s.  | n.s.  | n.s.  | <0.01 |
| gRNA only       | n.s.  | n.s.  | n.s.  | n.s.  | n.s.  | n.s.  | <0.01 |
| No transduction | <0.01 | <0.01 | <0.01 | <0.01 | <0.01 | <0.01 | n.s.  |

**Supplementary figure 13**

| Off-target editing           | gRNA vector and donor vector | gRNA-donor all-in-one | Donor-gRNA all-in-one | Donor only | No transduction |
|------------------------------|------------------------------|-----------------------|-----------------------|------------|-----------------|
| gRNA vector and donor vector | n.s.                         | n.s.                  | n.s.                  | n.s.       | n.s.            |
| gRNA-donor all-in-one        | n.s.                         | n.s.                  | n.s.                  | n.s.       | n.s.            |
| Donor-gRNA all-in-one        | n.s.                         | n.s.                  | n.s.                  | n.s.       | n.s.            |
| Donor only                   | n.s.                         | n.s.                  | n.s.                  | n.s.       | n.s.            |
| No transduction              | n.s.                         | n.s.                  | n.s.                  | n.s.       | n.s.            |

## Supplementary figures

### Supplementary figure 1. Genome editing with Cas9 protein delivery lentiviral vectors

**encoding guide RNA.** (a) Hypothetical model for delivery of Cas9 protein via Cas9-CypA fusion

proteins with guide RNA-encoding lentiviral vectors for genome editing. (b) A GFP knock-down

model using a GFP-positive HEL cell line transduced with lentiviral vectors encoding GFP-

targeting guide RNA with CypA-Cas9 or Cas9-CypA protein delivery. (c) GFP DNA breakage,

evaluated by %GFP in flow cytometry 14 days post-transduction. Values: mean  $\pm$  standard error.

The experiments were performed in triplicate.

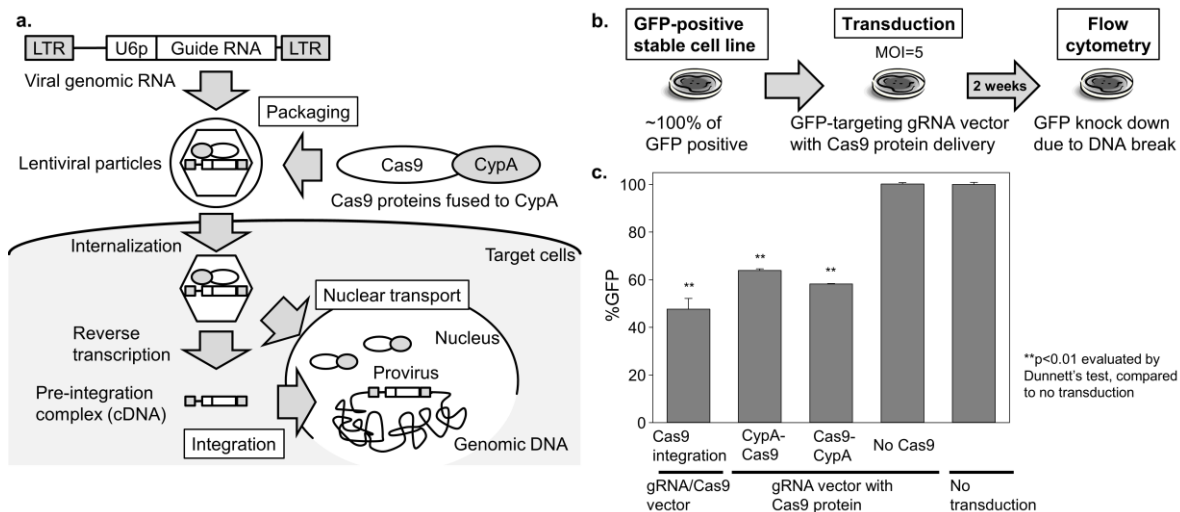

**Supplementary figure 2. Transient nuclease function is observed with Cas9 protein**

**delivery guide RNA/donor DNA NILV.** (a) Transduction of a GFP+ HEL cell line with all-in-one

NILVs encoding GFP-targeting guide RNA and YFP donor DNA with Cas9 protein delivery at

MOI 5, followed by second transduction (6 days later) with guide RNA/donor DNA NILV without

Cas9 protein at MOI 5. (b) GFP DNA breakage and GFP-to-YFP conversion, evaluated by flow

cytometry 15 days post-1st transduction. (c) Time-series %YFP after 1st (and 2<sup>nd</sup>) transduction

with NILVs. Values: mean  $\pm$  standard error. The experiments were performed in triplicate.

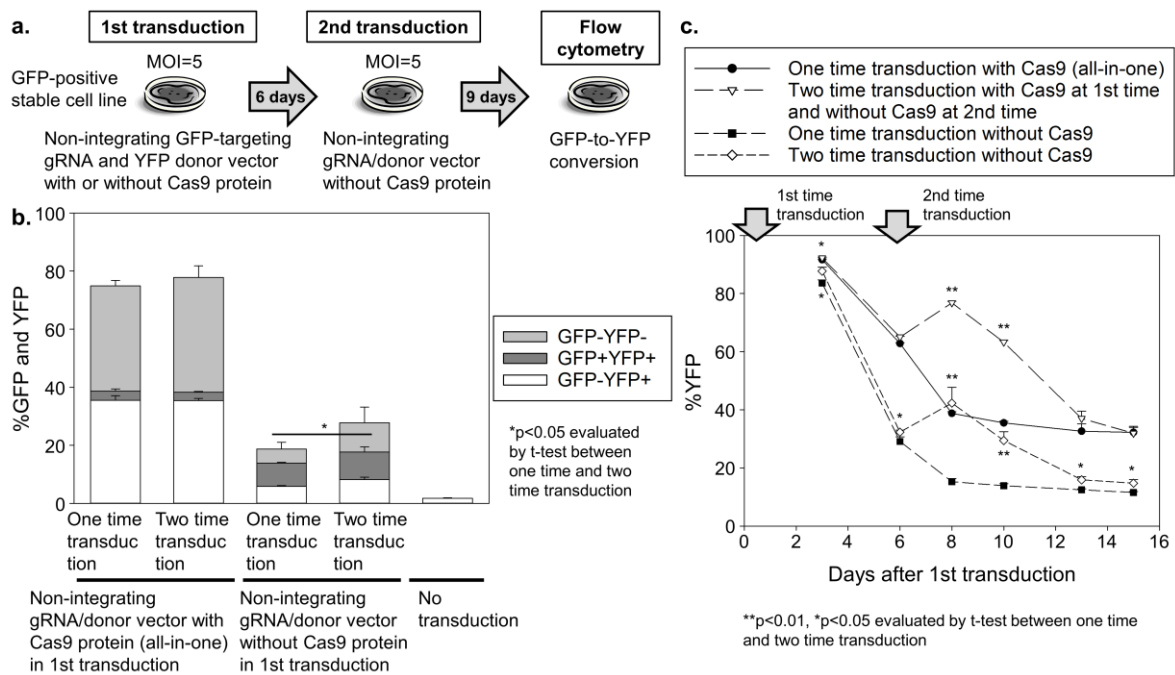

**Supplementary figure 3. GFP-to-YFP gene conversion is detected by polymerase chain**

**reaction (PCR).** (a) GFP-to-YFP gene conversion using NILVs encoding GFP-targeting guide

RNA and YFP donor DNA with Cas9 protein delivery, evaluated by PCR (0.7kb) as compared to

YFP donor DNA vector (1.1kb) 15 days post-transduction in a GFP+ HEL cell line. (b) DNA

sequencing of 0.7kb PCR fragments for GFP-to-YFP gene conversion. RRE: rev response

element. The experiments were performed in single run.

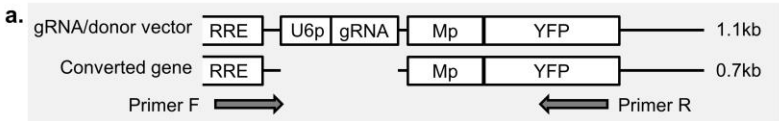

Non-integrating gRNA/donor vector with Cas9 protein      Non-integrating gRNA/donor vector without Cas9 protein      No transduction

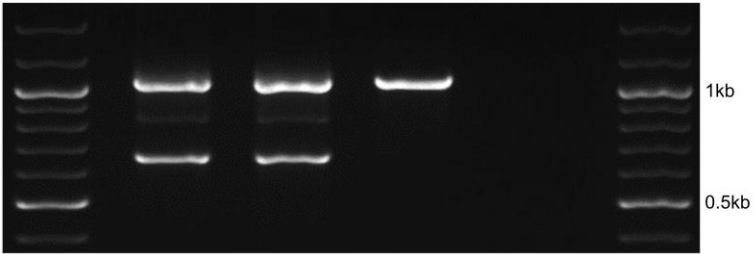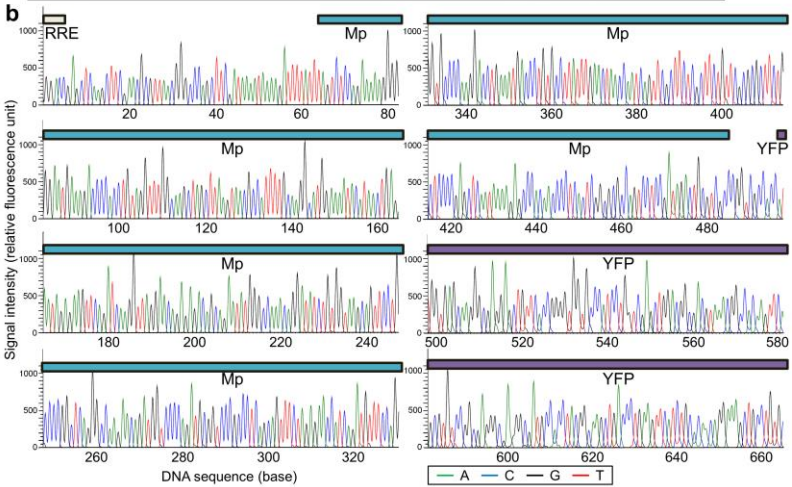



**Supplementary figure 4. Comparison of GFP-to-YFP gene conversion between DNA and**

**protein levels with Cas9 protein delivery NILVs. (a) GFP-to-YFP gene conversion using**

NILVs encoding GFP-targeting guide RNA and YFP donor DNA with Cas9 protein delivery (all-

in-one) at the protein level, evaluated by flow cytometry 14 days post-transduction in a GFP+

HEL cell line. (b) GFP-to-YFP gene conversion at the DNA level using the same samples,

evaluated by GFP- and YFP-specific vector copy number (VCN) in qPCR. (c) LTR- and PS-

based VCNs in the same samples, evaluated by qPCR. Values: mean  $\pm$  standard error. The

experiments were performed in triplicate. LTR: long terminal repeat, PS: packaging signal.

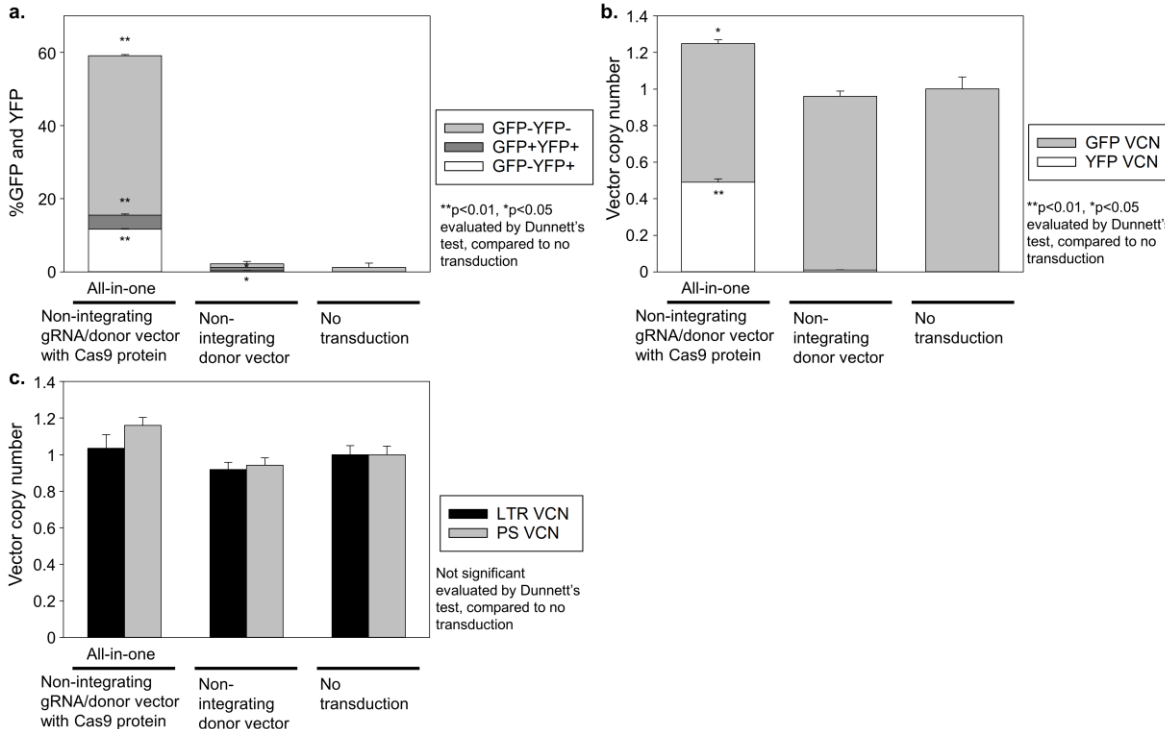

**Supplementary figure 5. GFP-to-YFP gene conversion occurs with Cas9 protein delivery**

**guide RNA/donor DNA NILV without a promoter for YFP expression.** GFP-to-YFP gene conversion 11 days post-transduction in a GFP+ HEL cell line using NILVs encoding GFP-targeting guide RNA and YFP donor DNA with Cas9 protein delivery (all-in-one vector) with or without a promoter (Mp) for YFP expression. Values: mean ± standard error. The experiments were performed in triplicate.

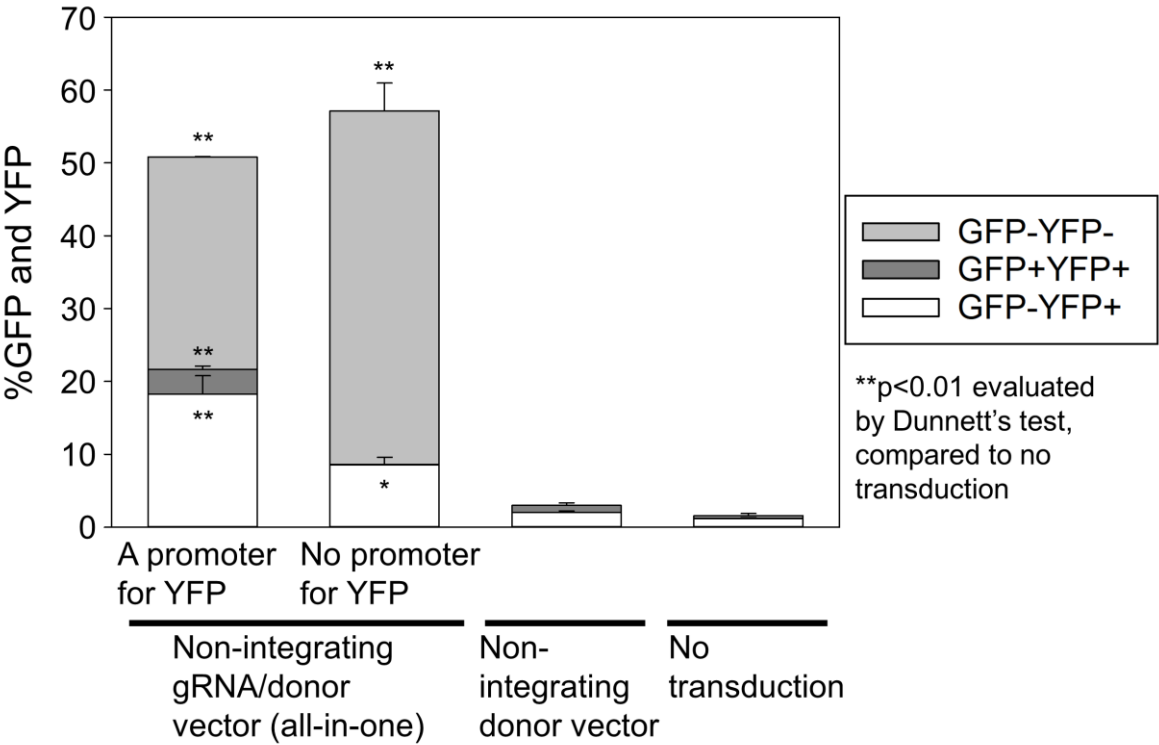

**Supplementary figure 6. Lentiviral tiers for multiple guide RNA sequences with or**

**without Cas9 protein.** Integrating lentiviral vector titers for guide RNA/donor DNA (all-in-one)

including 9x pseudo guide RNA with or without Cas9 protein, evaluated by YFP expression in

Hela cells. Values: mean  $\pm$  standard error. The experiments were performed in triplicate.

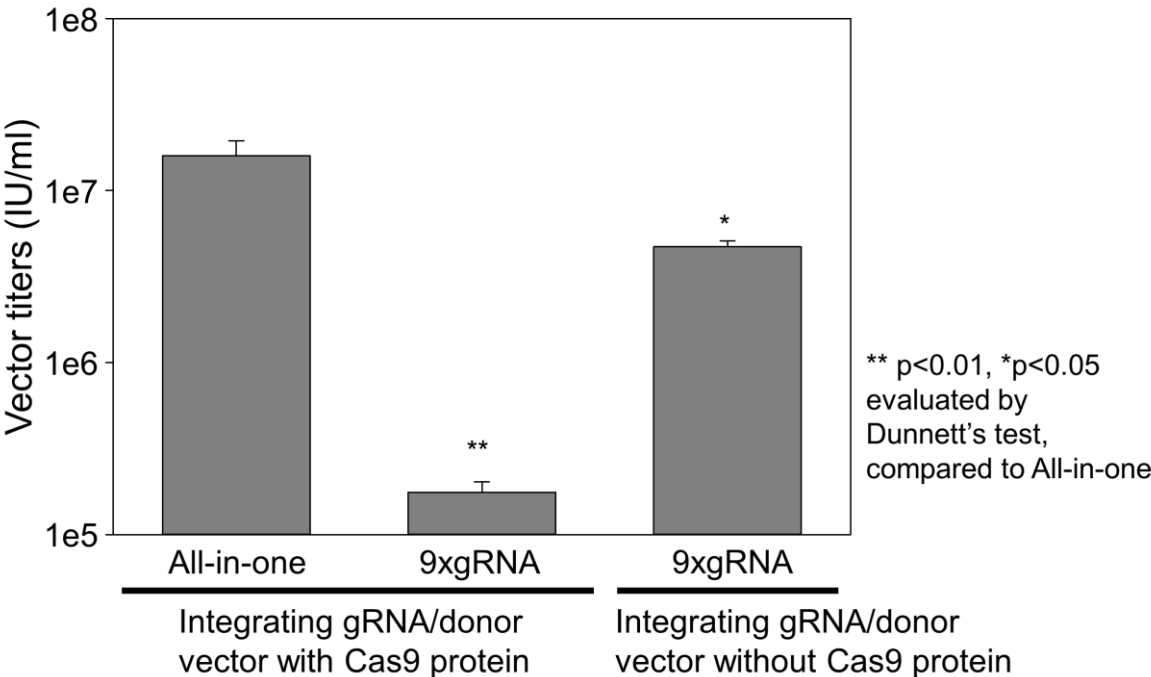

**Supplementary figure 7. Detection of Cas9 protein in the pellets of lentiviral vectors.**

NILVs encoding GFP-targeting guide RNA and YFP donor DNA (all-in-one), all-in-one including 4x pseudo guide RNA (4xgRNA), and donor DNA without guide RNA were prepared with a Cas9-expressing plasmid as well as without the Cas9 plasmid (only for all-in-one vector). Using Western blot analysis, Cas9 protein and HIV-1 capsid were detected in the vector pellets. The experiments were performed in duplicate.

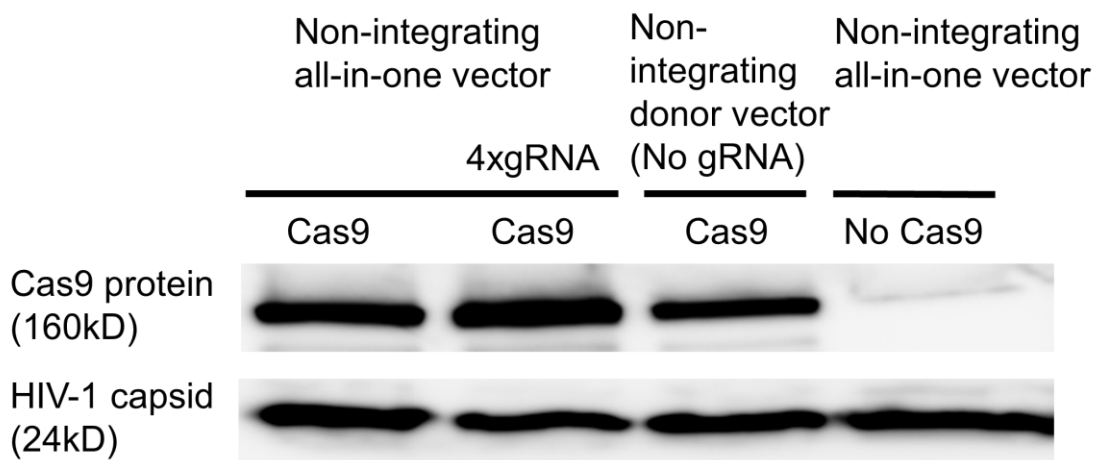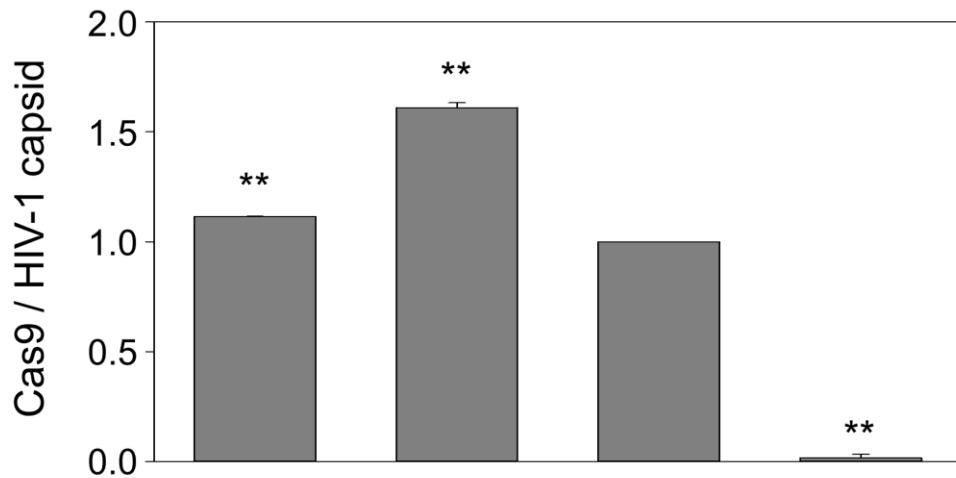

\*\*p<0.01 evaluated by Dunnett's test, compared to no gRNA vector

**Supplementary figure 8. Flow cytometry panels to evaluate GFP-to-YFP gene conversion.**

Flow cytometry panels to evaluate GFP-to-YFP gene conversion at escalating MOIs (5, 10, 25, and 50) of guide RNA/donor DNA (all-in-one) NILV with Cas9 protein delivery 14 days post-transduction in a GFP+ HEL cell line. HEL cells: human erythrocythemia cells. Values: mean  $\pm$  standard error. The experiments were performed in triplicate.

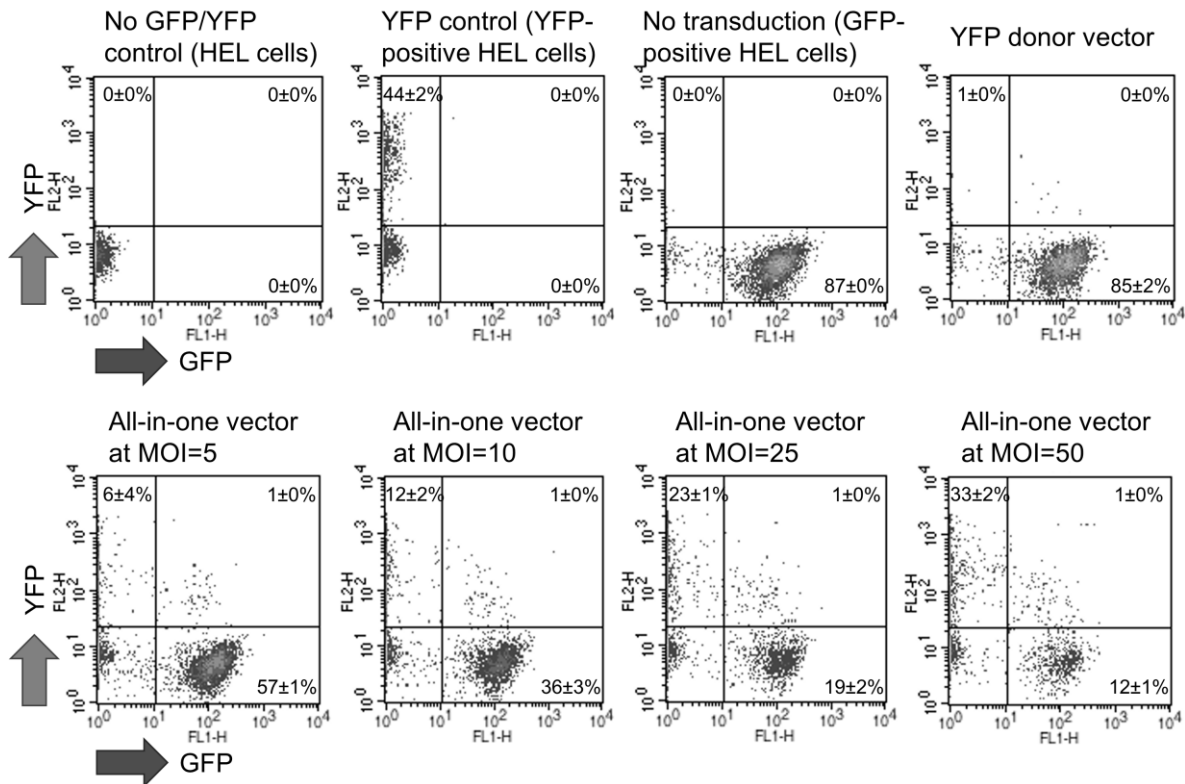

**Supplementary figure 9. Screening of guide RNAs for  $\beta$ -globin gene editing in a GFP recombination model.** (a) Design for several guide RNAs (BG1-11) targeting the  $\beta$ -globin gene. (b) Design of integrating guide RNA/Cas9 vectors targeting the  $\beta$ -globin gene as well as a donor DNA NILV encoding both partial  $\beta$ -globin gene and GFP marker gene. The donor vector doesn't express GFP due to the absence of a polyadenylation signal, while GFP expression is allowed by gene conversion at the endogenous  $\beta$ -globin gene. (c) GFP expression in K562 cells transduced with various guide RNA/Cas9 vectors and  $\beta$ -globin/GFP donor vector, evaluated by flow cytometry 7-8 days post-transduction. Sp: spleen focus forming virus promoter. Values: mean  $\pm$  standard error. The experiments were performed in triplicate.

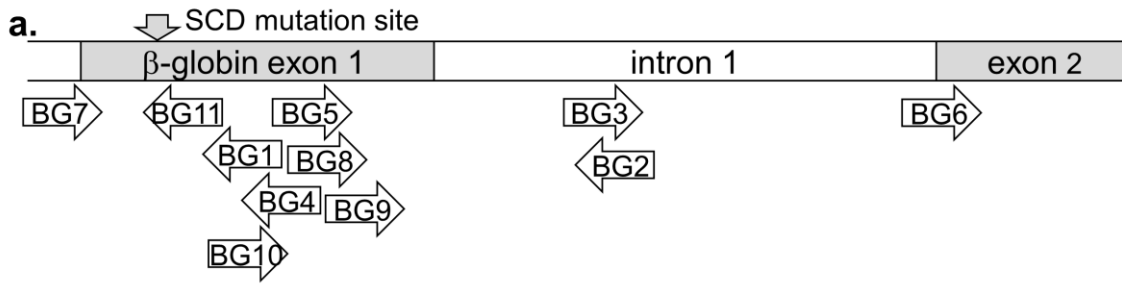

**b. Integrating gRNA/Cas9 vector targeting  $\beta$ -globin gene**

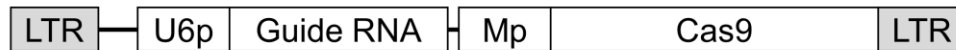

Non-integrating donor vector encoding partial  $\beta$ -globin gene and GFP marker

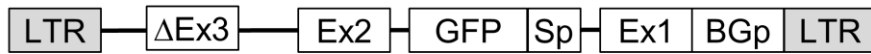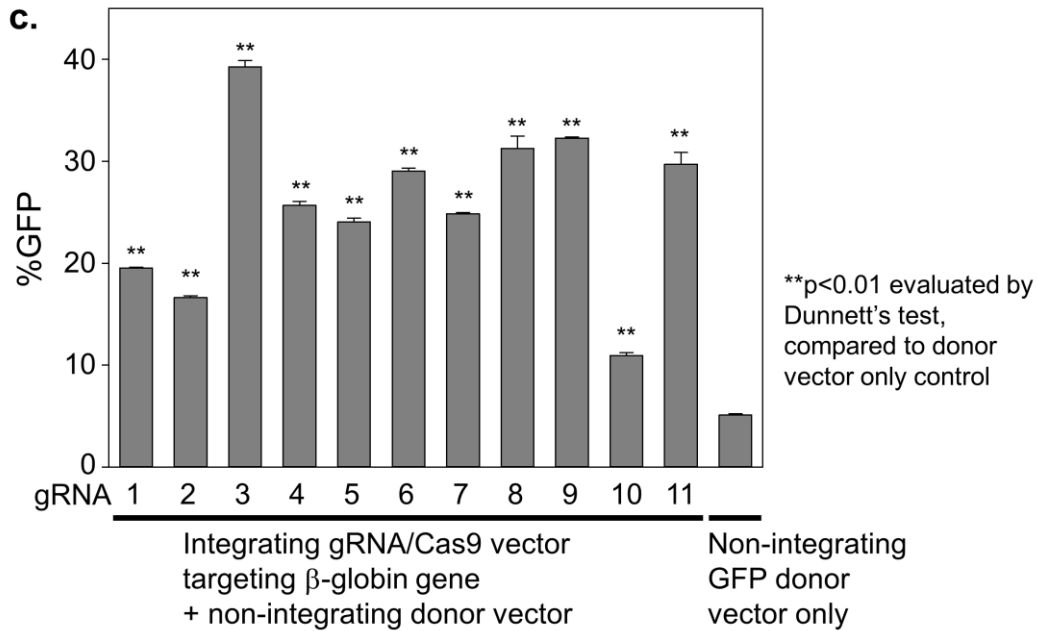

**Supplementary figure 10. Efficient  $\beta$ s-globin DNA breakage with guide RNA NILVs with**

**Cas9 protein delivery.** The DNA break ratios in the endogenous  $\beta$ s-globin gene 8 days post-

transduction in sickle HUDEP-2 cells, evaluated by quantitative polymerase chain reaction

(qPCR). Values: mean  $\pm$  standard error. The experiments were performed in triplicate.

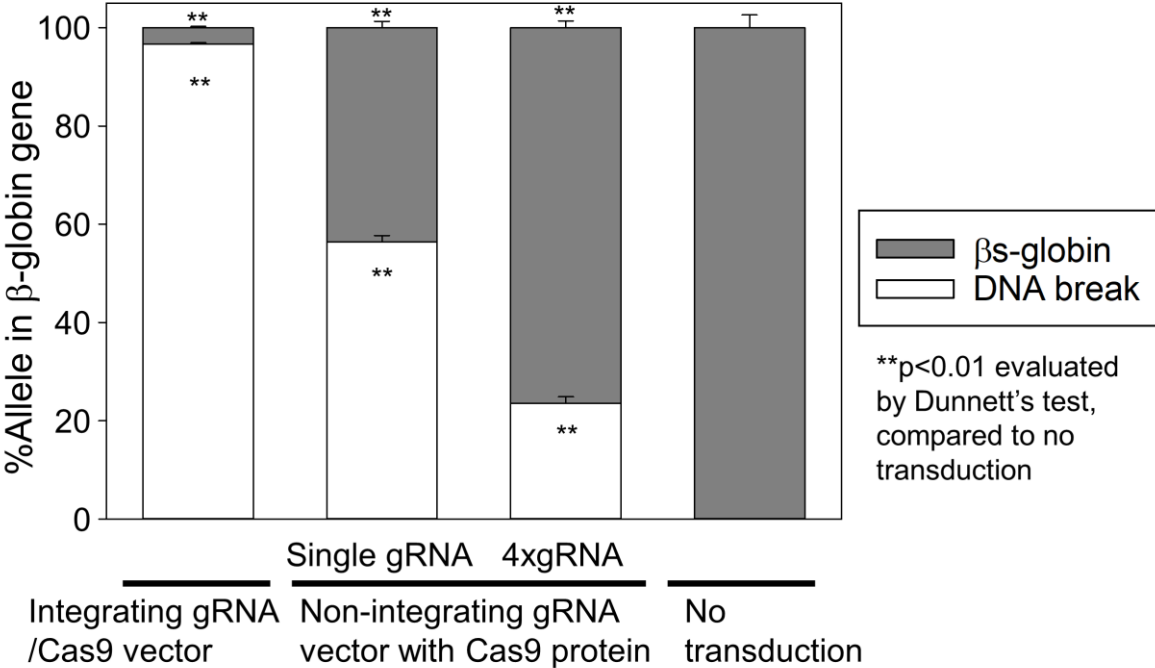



**Supplementary figure 11. Various sizes of  $\beta$ -globin donor DNA NILVs for SCD gene**

**correction.** (a) Design for  $\beta$ -globin donor DNA NILVs encoding various sizes of normal  $\beta$ -globin gene (0.3kb, 0.4kb, 0.7kb, 1.7kb, and 2.0kb) for SCD gene correction. (b)  $\beta$ s-to- $\beta$ -globin gene correction at the protein level (RP-HPLC) 19 days after erythroid differentiation in immortalized erythroid cells including the SCD mutation (sickle HUDEP-2 cells), which were transduced with a SG11 guide RNA vector with Cas9 protein delivery and each donor vector at MOI 25. (c) Cell counts in gene-corrected cells 19 days after erythroid differentiation.  $\Delta$ Ex2: 5'-side partial  $\beta$ -globin exon 2,  $\Delta$ BGp: 3'-side  $\beta$ -globin promoter. All experiments were performed in a single run.

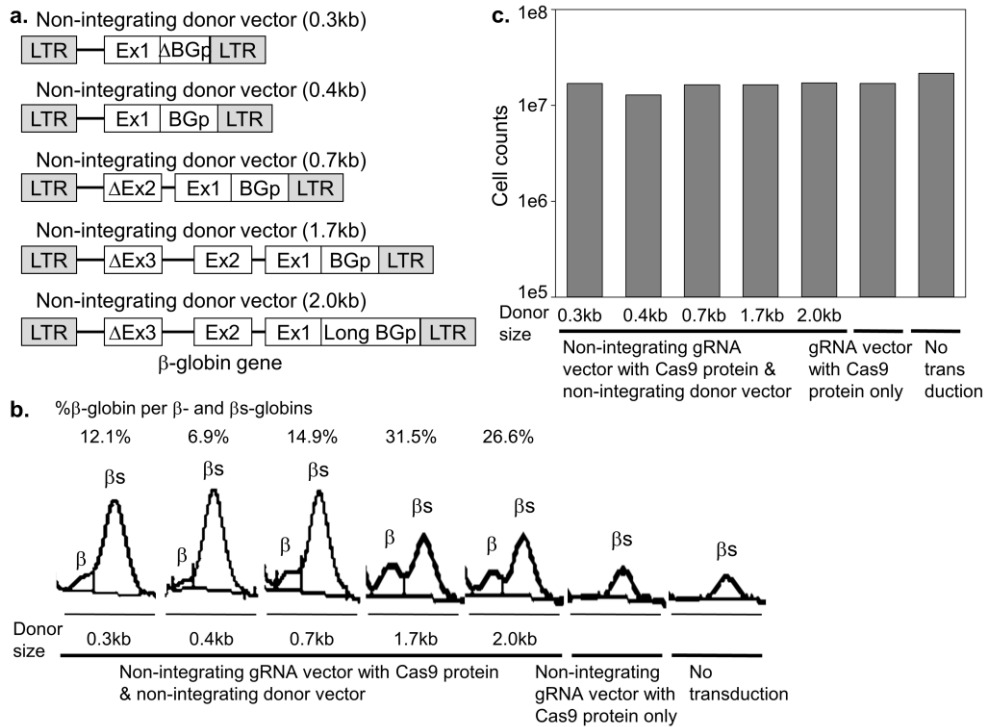

**Supplementary figure 12. SCD gene correction with a Cas9 protein delivery integrating**

**SG11 guide RNA vector along with  $\beta$ -globin donor DNA NILVs.**

(a)  $\beta$ s-to- $\beta$ -globin gene correction at the DNA level (qPCR) 19 days after erythroid differentiation in immortalized

erythroid cells including the SCD mutation (sickle HUDEP-2 cells), which were transduced with

a Cas9 protein delivery integrating SG11 guide RNA vector and various sizes of  $\beta$ -globin donor

NILVs (0.3kb, 0.4kb, 0.7kb, 1.7kb, and 2.0kb) at MOI 25. (b)  $\beta$ s-to- $\beta$ -globin gene correction at

the protein level (RP-HPLC) in gene-corrected immortalized erythroid cells. (c) Cell counts in

gene-corrected cells following erythroid differentiation. Values: mean  $\pm$  standard error. All

experiments were performed in a single run, except Supplementary figure 12a (in triplicate).

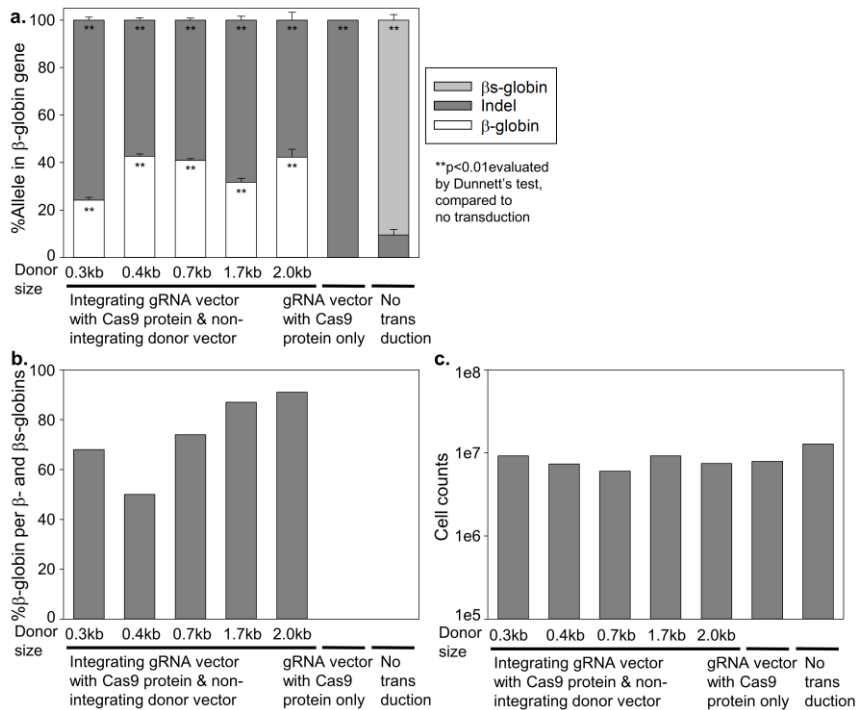

**Supplementary figure 13. Undetectable off-target  $\delta$ -globin gene editing in  $\beta$ s-to- $\beta$ -globin**

**gene correction with Cas9 protein delivery NILVs.** Off-target  $\delta$ -globin gene editing at the

DNA level 7-8 days after erythroid differentiation in gene-corrected sickle HUDEP-2 cells,

evaluated by targeted deep sequencing (the same samples in Figure 3f). Values: mean  $\pm$

standard error. This experiment was performed in 1-4 times.

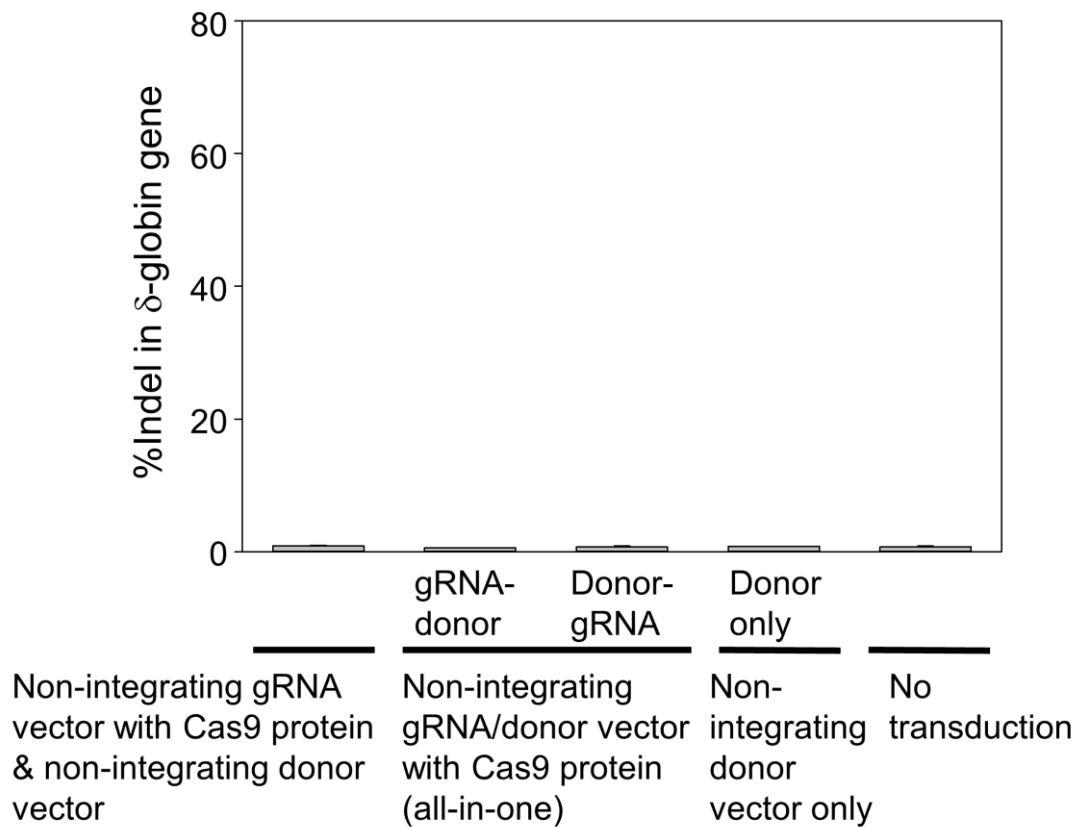

Not significant evaluated by Dunnett's test, compared to no transduction

**Supplementary figure 14. Efficient  $\beta$ s-to- $\beta$ -globin gene correction with Cas9 protein**

**delivery NILVs.**  $\beta$ s-to- $\beta$ -globin gene correction at the protein level (HbS-to-HbA) 7 days after erythroid differentiation in an immortalized erythroid cell line including the SCD mutation (sickle HUDEP-2 cells) with Cas9 protein delivery NILV transduction, evaluated by hemoglobin electrophoresis. HbS: sickle hemoglobin, HbF: fetal hemoglobin, HbA: adult hemoglobin. The experiments were performed in a single run.

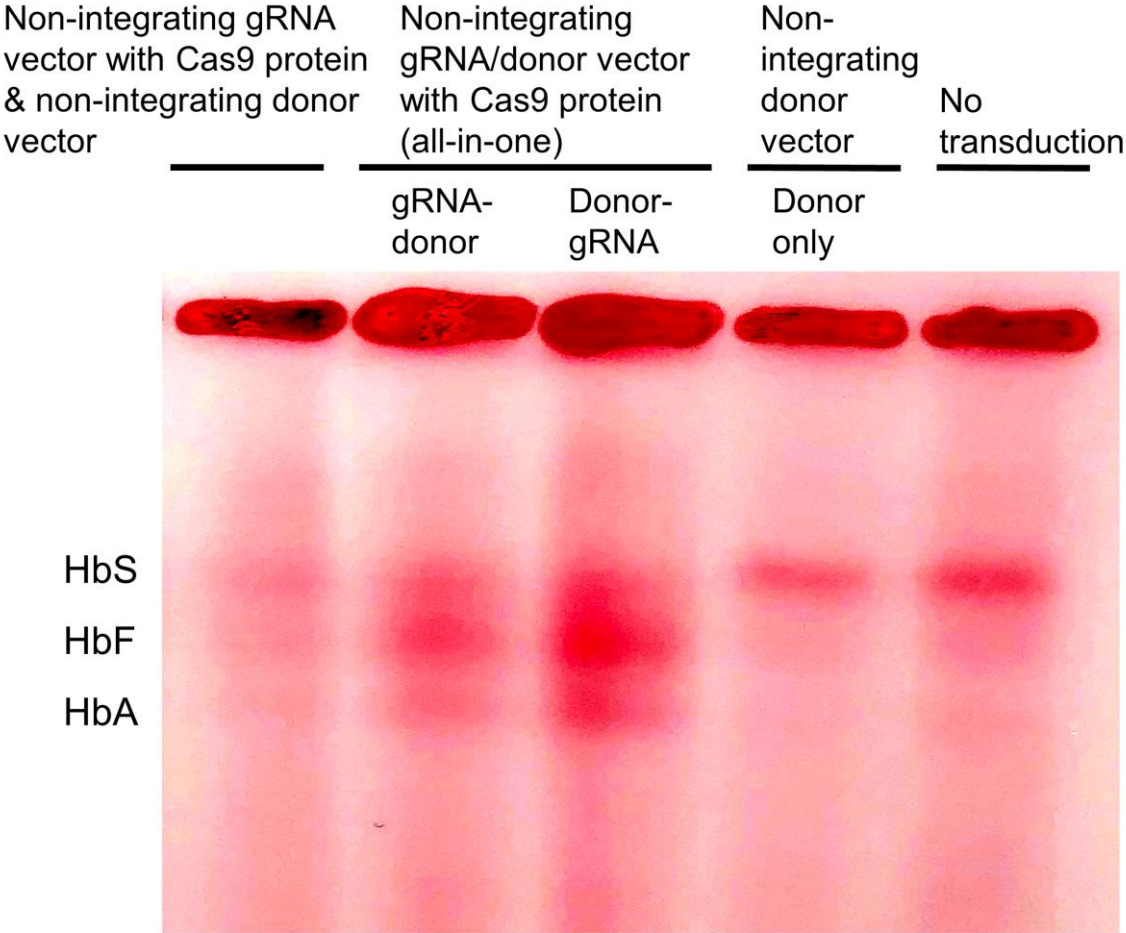

**Supplementary figure 15. Comparison of  $\beta$ s-to- $\beta$ -globin gene correction between**

**lentiviral Cas9 protein delivery and electroporation-mediated delivery. (a-b) Comparison**

of  $\beta$ s-to- $\beta$ -globin gene correction (a) and cell counts (b) 19 days after erythroid differentiation in

an immortalized erythroid cell line including the SCD mutation (sickle HUDEP-2 cells) among

(1) Cas9 protein delivery SG11 guide RNA NILV and  $\beta$ -globin donor DNA NILV (0.4kb) at MOI

25 without electroporation, (2) the same guide RNA vector and donor vector transduction

followed by electroporation at day 1, (3) Cas9 protein delivery guide RNA NILV and  $\beta$ -globin

donor single strand DNA (ssDNA) (0.1kb) with electroporation, (4) SG11 guide RNA-Cas9

ribonucleoprotein (RNP) with electroporation and donor NILV, and (5) SG11 RNP and  $\beta$ -globin

donor ssDNA with electroporation. The experiments were performed in a single run.

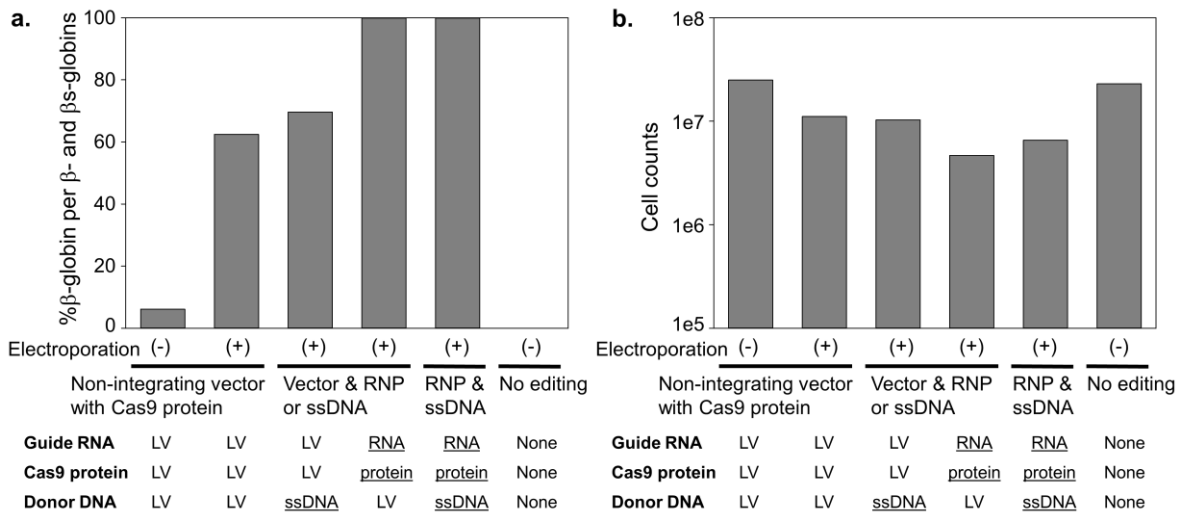

**Supplementary figure 16. Transgene expression from integrating and NILVs. %GFP in**

K562 cells 2 weeks after transduction with either GFP integrating vector or GFP NILV (under

the control of Mp) at MOI 0.5. Values: mean  $\pm$  standard error. The experiments were performed

in triplicate.

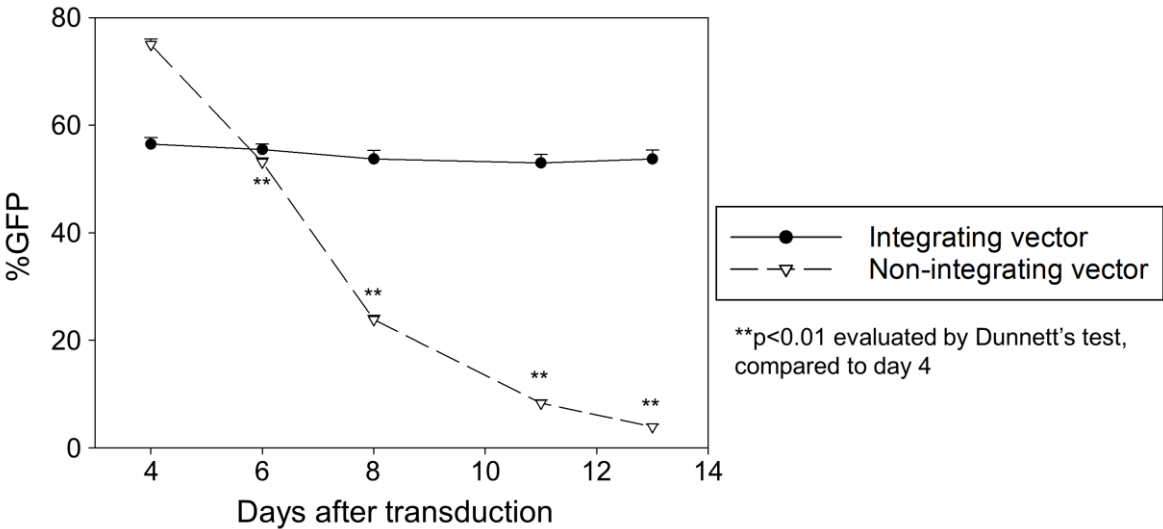

**Supplementary figure 17. Comparison between GFP target vector, YFP donor vector, and**

**guide RNA/YFP donor vector.** Design for GFP target vector, YFP donor DNA vector, and guide RNA/YFP donor DNA vector. A single copy of vector genome (3.6kb) is integrated into a GFP-positive HEL cell line which was used in GFP-to-YFP gene conversion. The YFP donor DNA vector encodes the same vector backbone and 14-base difference within YFP gene, compared to the GFP targeted vector. The GFP-targeting guide RNA/YFP donor DNA vector includes 14-base difference within YFP gene and 390-base insertion of guide RNA expression cassette, compared to the GFP target vector.  $\psi$ : packaging signal, cPPT: central polypurine tract, RRE: Rev response element.

**GFP target vector (3.6kb)**

: A single copy of integration in a stable cell line

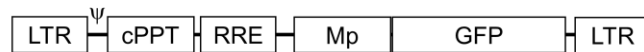

**YFP donor DNA vector (3.6kb)**

: 14-base difference in YFP

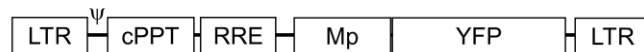

**GFP-targeting guide RNA /**

**YFP donor DNA vector (3.9kb)**

: 14-base difference in YFP and 390-base insertion of guide RNA expression cassette

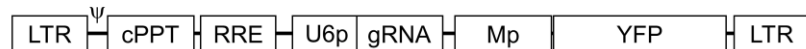

Supplement: mmc1.pdf [file mmc1.pdf]
